# Supplementary material for: Changes in protein expression after treatment with Ancylostoma caninum excretory/secretory products in a mouse model of colitis
Source: PubMed Central journal article supplement (PMC5304188; doi:10.1038/srep41883), 2017-02-13

## **SUPPLEMENTARY FILES**

### **TITLE:**

Changes in protein expression after treatment with *Ancylostoma caninum* excretory/secretory products in a mouse model of colitis

### **AUTHORS:**

Javier Sotillo, Ivana Ferreira, Jeremy Potriquet, Thewarach Laha, Severine Navarro, Alex Loukas, Jason Mulvenna

FIGURE S1

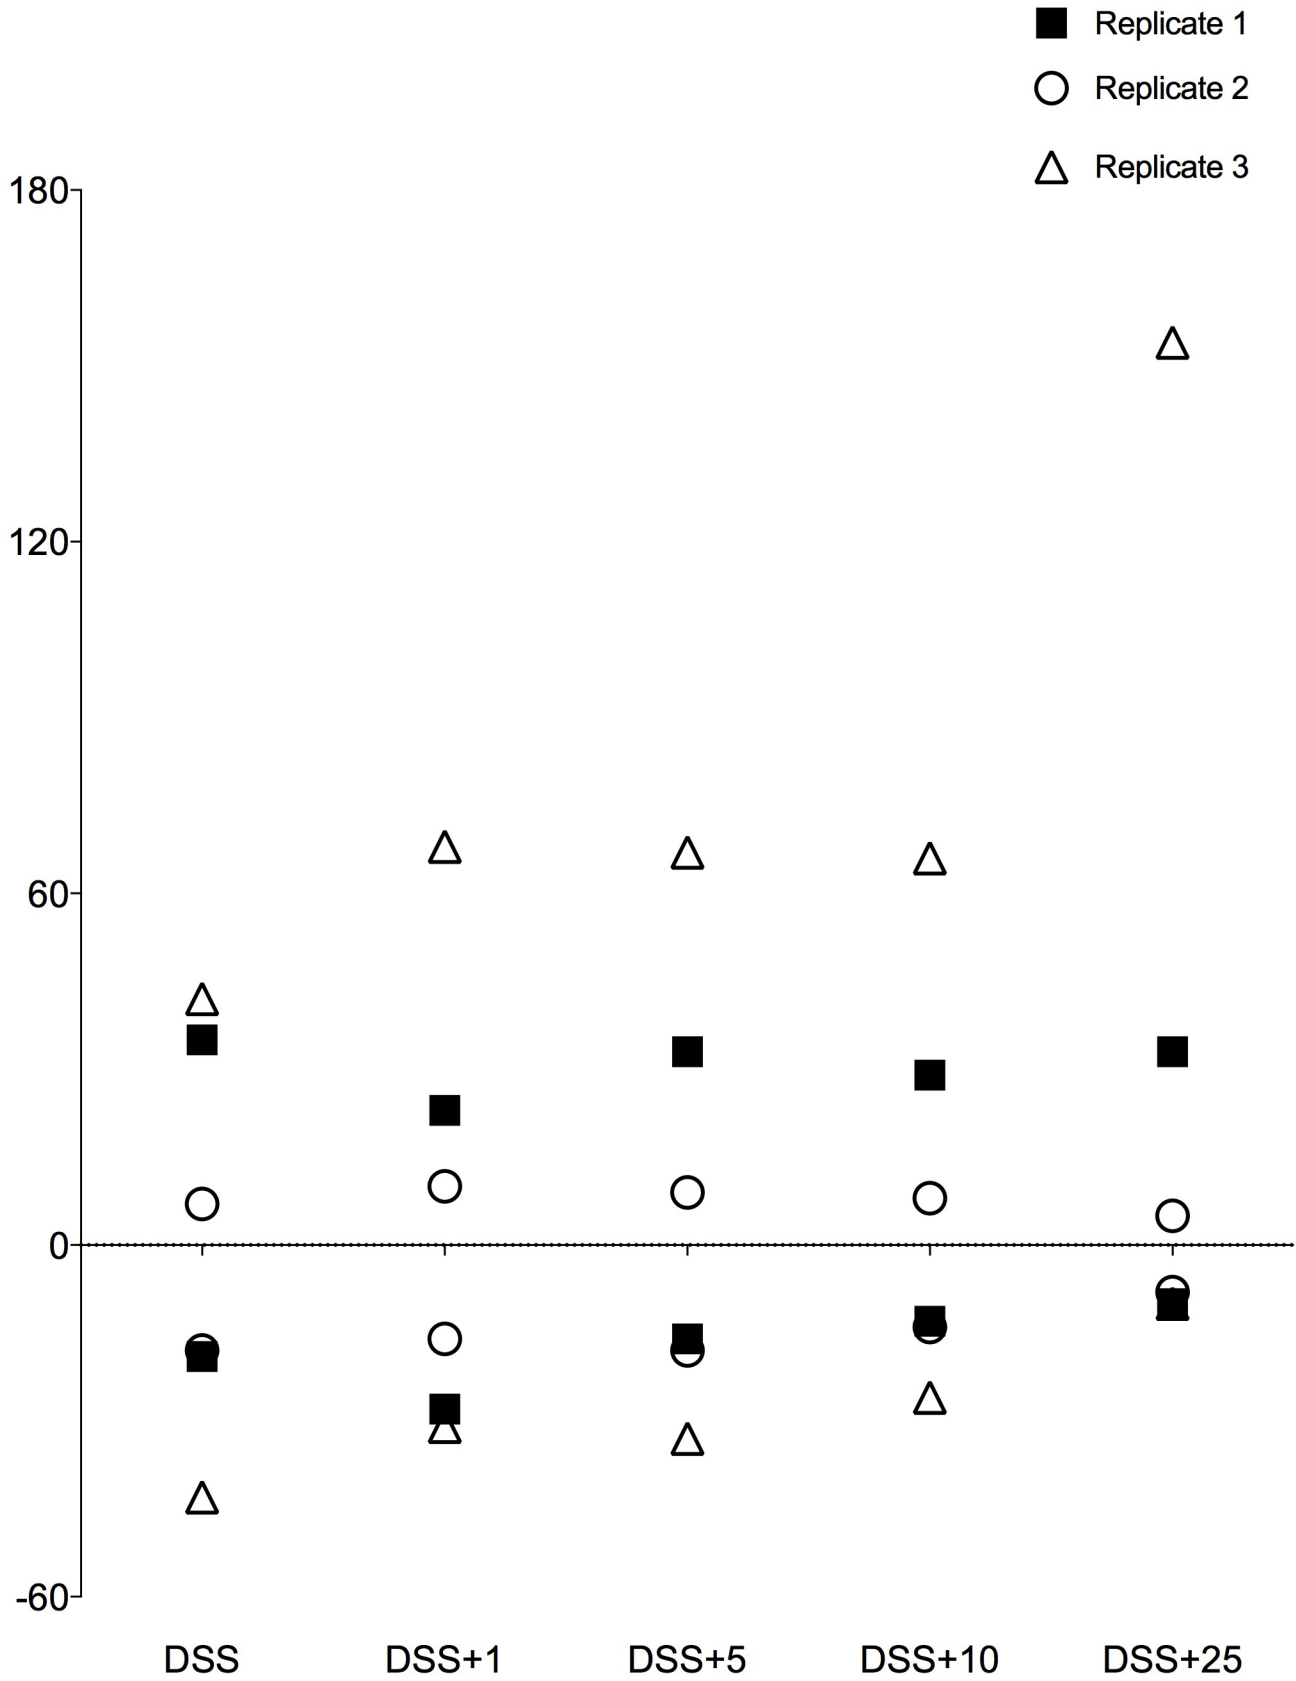

FIGURE S2

A

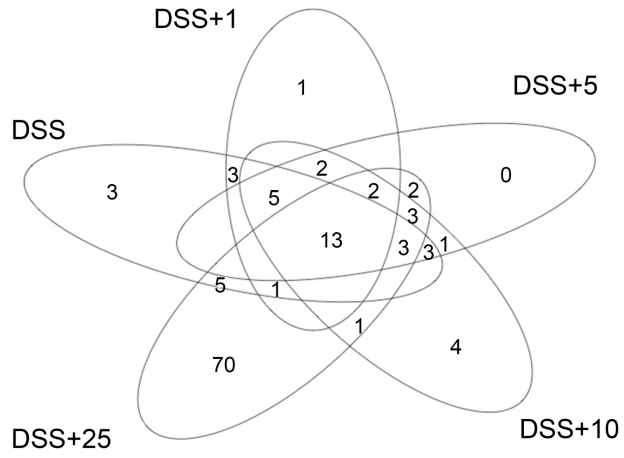

B

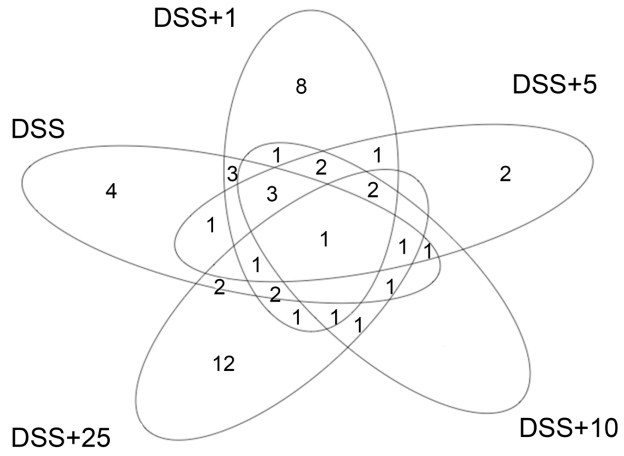

C

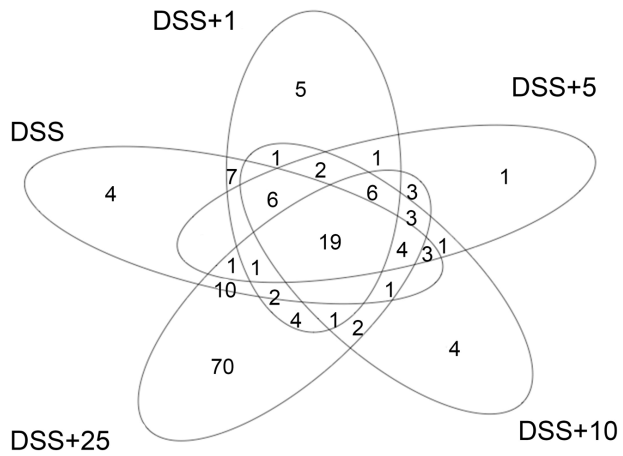

**FIGURE S3**

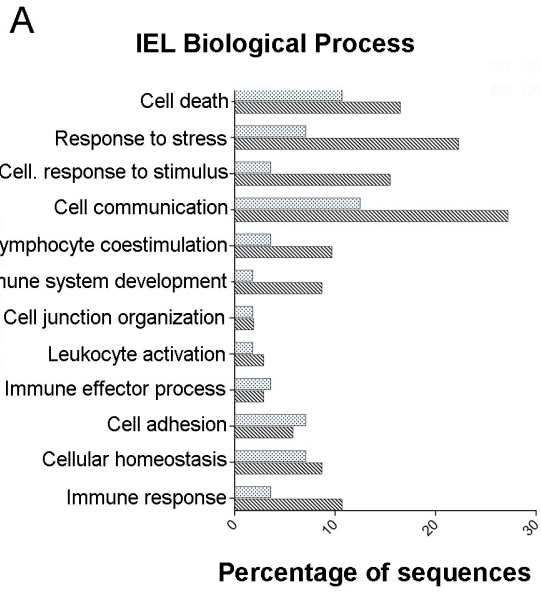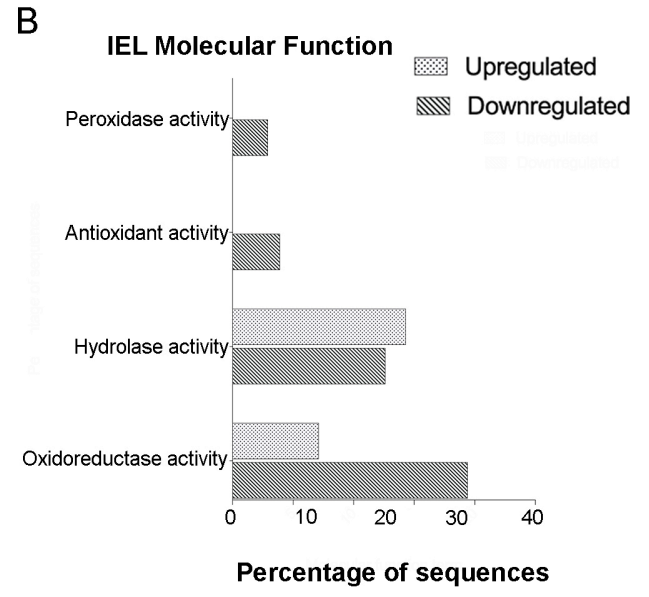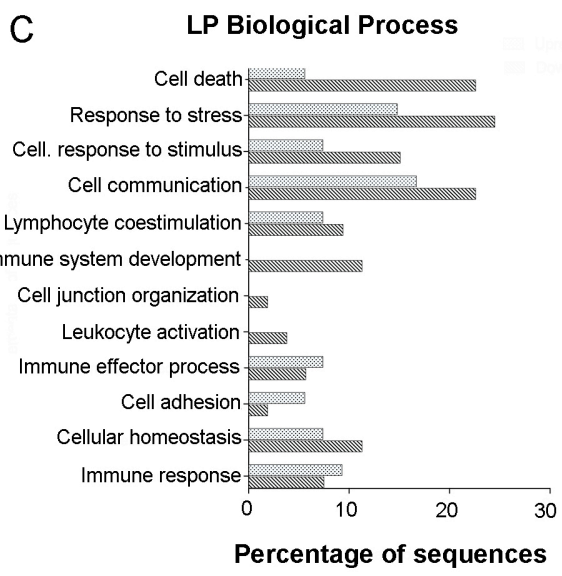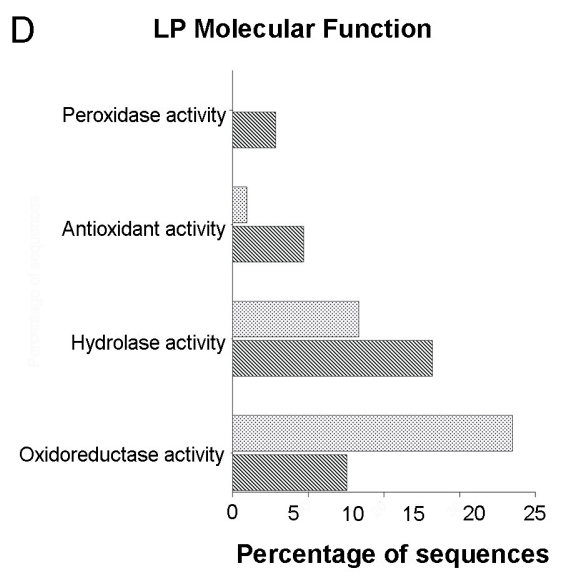

Supplement: srep41883-s1.pdf [file srep41883-s1.pdf]
